# Supplementary material for: miR-324-5p and miR-30c-2-3p Alter Renal Mineralocorticoid Receptor Signaling under Hypertonicity
Source: MDPI journal article supplement (doi:10.3390/cells11091377), 2022-04-19
Supplement: s1 [file s1]

## Supplementary Tables

**Table S1** miRNA Stem-loop and TaqMan probes for miRNAs RT-qPCR

| miRNAs           | Accession Number | Sequences                                             | ID     |
|------------------|------------------|-------------------------------------------------------|--------|
| mmu-miR-135a-5p  | MIMAT0000147     | TATGGCTTTTATTCTATGTGA                                 | 000460 |
| mmu-miR-28a-3p   | MIMAT0004661     | CACTAGATTGTGAGCTGCTGGA                                | 002545 |
| mmu-miR-30c-2-3p | MIMAT0005438     | CTGGGAGAAGGCTGTTACTCT                                 | 002110 |
| mmu-miR-324-5p   | MIMAT0000555     | CGCATCCCCTAGGGCATTGGTGT                               | 000539 |
| mmu-miR-335-5p   | MIMAT0000766     | TCAAGAGCAATAACGAAAAATGT                               | 000546 |
| mmu-miR-16       | MIMAT0000527     | TAGCAGCACGTAAATATTGGCG                                | 000391 |
| snoRNA 202       | AF357327         | GCTGTACTGACTTGATGAAAGTACTTTTGAACCCCTTTTCC<br>ATCTGATG | 001232 |

**Table S2** Primer sequences

All primer sequences are shown from 5' to 3'.

**Table S2A** Primer sequences used for RNAs RT-qPCR

| Name                    | Accession Numbers | Amplicon size (pb) | Forward primer            | Reverse primer         |
|-------------------------|-------------------|--------------------|---------------------------|------------------------|
| <i>Nr3c2</i> (MR)       | M36074            | 153                | ATGGAAACCACACGGTGACCT     | AGCCTCATCTCCACACACCAAG |
| <i>zfp361l</i> (Tis11b) | NM_007564.3       | 100                | CGACACACCAGATCCTAGTCCTT   | TGCATAAACTTCGCTCAAGTCA |
| <i>Elavl1</i> (HuR)     | NM_010485.3       | 87                 | CAGCCAATCCCAACCAGAA       | TGGTGTACAGGGCCTCCAAA   |
| <i>Tsc22d3</i> (Gilz)   | NM_010286.3       | 79                 | CTGCTGTGGAGTTGTGACATACTAG | CCAGGCAGGCACCTTCTAAGCT |
| <i>Sgk1</i>             | AF205855          | 150                | TCACTTCTCATTCCAGACCGC     | ATAGCCCAAGGCACTGGCTA   |
| <i>18S</i>              | X00686            | 66                 | CCCTGCCCTTTGTACACACC      | CGATCCGAGGGCCTCACTA    |
| <i>Rplp0</i> (36b4)     | NM_007475.5       | 128                | AGCGCGTCTGGCATTGTCTGT     | GGGCAGCAGTGGTGGCAGCAGG |

**Table S2B** Primer sequences used for cloning the pMIR-mHuR-3'-UTR

| Name            | Forward primer                   | Reverse primer             |
|-----------------|----------------------------------|----------------------------|
| pMIR-mHuR-3'UTR | ACGCACTAGTCGGAATAGATAATTAAGAGTGA | ACGCAGCTTCCACCTTTCTTTTCTGA |

**Table S3** miRNAs Mimics & Inhibitors references for transfection

| Name                       | ID      |
|----------------------------|---------|
| 324-5p Mimic               | MC10253 |
| 30c-2-3p Mimic             | MC12646 |
| negative control Mimic     |         |
| 324-5p Inhibitor           | MH10253 |
| 30c-2-3p Inhibitor         | MH12646 |
| negative control Inhibitor |         |

**Table S4** Antibodies used for Western blot analysis

| Name (Provider)                             | Species | Protein           | Molecular weight (kDa) | Dilution                           |
|---------------------------------------------|---------|-------------------|------------------------|------------------------------------|
| <b>Primary antibodies</b>                   |         |                   |                        |                                    |
| 39N                                         | Rabbit  | MR                | 130 kDa                | 1:1000 (cells)<br>1:5000 (tissues) |
| $\alpha$ -Tubulin (Sigma)                   | Mouse   | $\alpha$ -Tubulin | 50 kDa                 | 1:5000                             |
| <b>Secondary antibodies</b>                 |         |                   |                        |                                    |
| Dylight Anti-Rabbit 800 (Fisher Scientific) | Goat    | Rabbit IgG        |                        | 1:10000                            |
| Dylight Anti-Mouse 680 (Fisher Scientific)  | Rabbit  | Mouse IgG         |                        | 1:10000                            |

## Supplementary figure legends

**Supplementary Figure S1:** miR-30c-2-3p functionally interacts with *Nr3c2* (MR) 3'-UTR. HEK 293T cells were transiently transfected with pMIR-mMR-3'-UTR plasmid (40 ng/well of 96-well plates) and incubated with increasing concentrations (5 or 10 nM) of negative control Mimics (CTR Mimic) or 30c-2-3p Mimics. Luciferase activities were measured 24 h after transfection and normalized to  $\beta$ -galactosidase activities. \*\*\* indicated  $P < 0.001$ . NS: non-significant.

**Supplementary Figure S2:** Morphology of Sm-A1 and Sh-H8 clones. Cells were grown for 5 days then were stimulated with 1  $\mu$ g/mL Doxycycline for 48 h. **a, c** Cellular morphology of Sm-A1 clone (**a**) and Sh-H8 clone (**c**) observed with a phase-contrast microscope. Clones maintain a cuboid shape characteristics of epithelial cells and form domes at confluency suggesting a transepithelial ionic transport. **b, d** Sh-A1 (**b**) and Sh-H8 clones (**d**) were observed with a fluorescent microscope after 48 h of doxycycline stimulation. Fluorescence of turbo Red Fluorescent Protein allowed easy identification of transduced KC3AC1 cells, which should express either scrambled miRNAs (upper panels) or miR-324-5p (lower panels).

**Supplementary Figure S3:** MR and miR-30c-2-3p, miR-324-5p expression in different nephron segments. **a** Schematic representation of the different nephron segments; Proximal convoluted tubules (PCT), medullary and cortical thick ascending limb of Henle's loop (mTAL and cTAL), connecting tubules (CNT), cortical and outer medullary collecting duct (CCD and OMCD). **b, c, d** Quantification by RT-qPCR of MR (**b**), miR-30c-2-3p (**c**) and miR-324-5p (**d**) expression in different nephron segments of control mice.

**Supplementary Figure S4:** Identification of half sites of Tonicity response Elements (TonEs) in regulatory sequences of miRNAs loci (red box). **a** Schematic representation of *mir30c-2* gene on murine chromosome 1 (green bar) and location of TonEs, which were identified with Jaspar software in *mir30c-2* promoter region (blue bar). **b** Schematic representation of *mir324* gene on murine chromosome 11 (green bar) and location of TonEs, which were identified with Jaspar software in *mir324* promoter region (violet bar). The bent arrow represents the transcription start site (TSS) of *mir30c-2* (**a**) and *mir324* genes (**b**), encoding miR-30c-2-3p and miR-324-5p, respectively.

***Nr3c2* (MR) 3'-UTR**

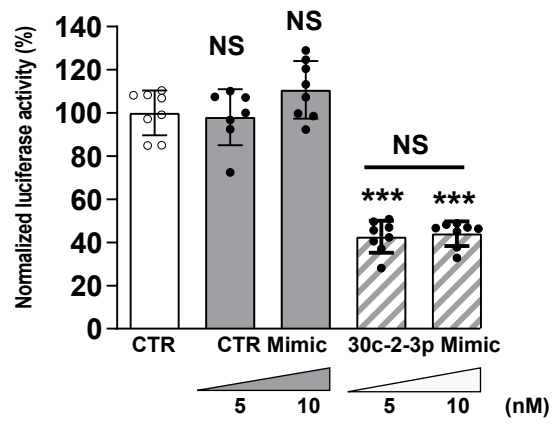

**Supplementary Figure S1**

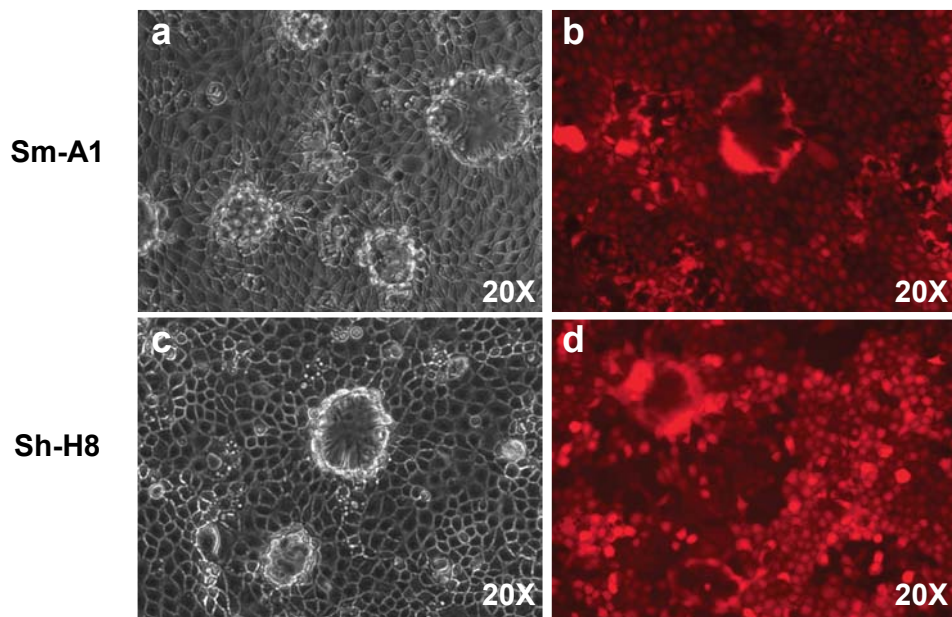

**Supplementary Figure S2**

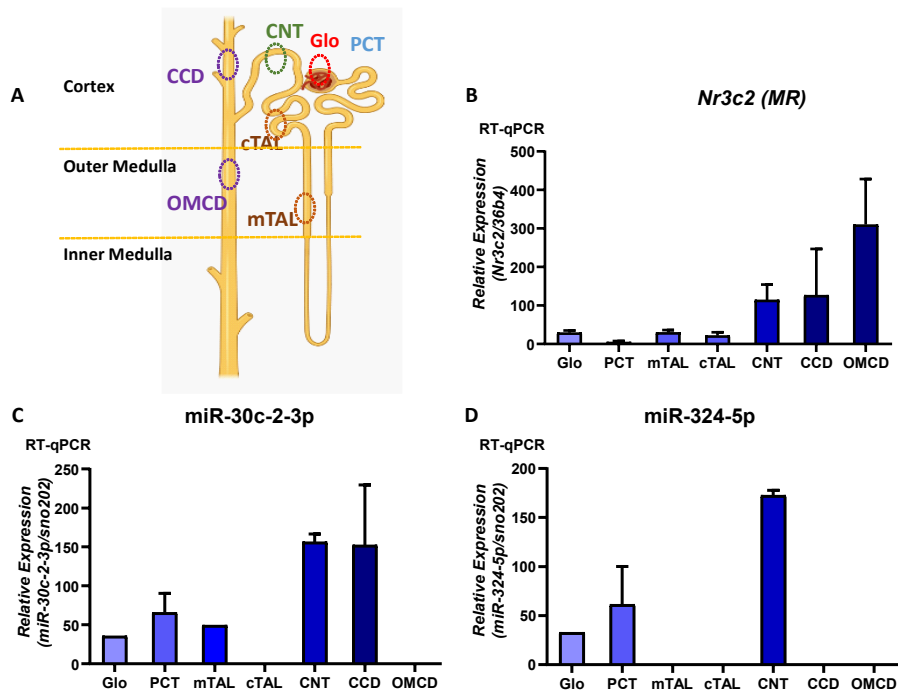

**Supplementary Figure S3**

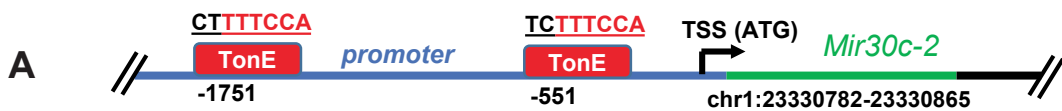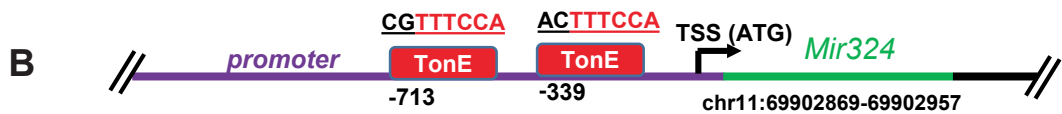

TonE : TGGAAANNYNY

Supplementary Figure S4
